# Supplementary material for: AC-265347 Inhibits Neuroblastoma Tumor Growth by Induction of Differentiation without Causing Hypocalcemia
Source: MDPI journal article supplement (doi:10.3390/ijms23084323), 2022-04-13
Supplement: s1 [file ijms-1680068-supplementary.pdf › ijms-1680068-supplementary.pdf]

# Supplementary Materials

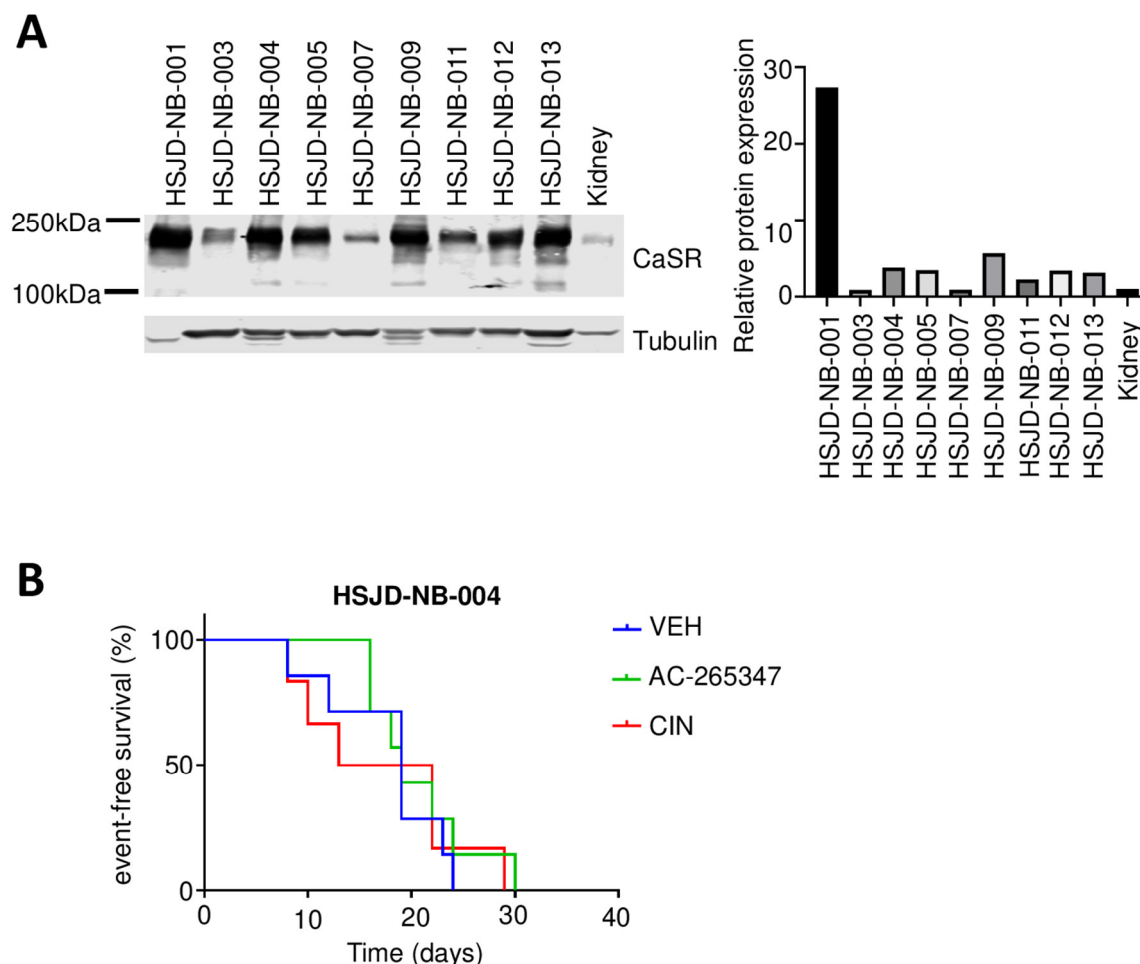

**Figure S1.** CaSR protein expression levels limits the effect of the calcimimetics. **A**– Right: Immunoblot showing CaSR expression levels of NB PDX models generated by our group. Left: Bands intensity was quantified relative to  $\alpha$ -tubulin. **B**– EFS curves of mice bearing HSJD-NB-004 exposed to 10mg/kg of AC-265347, CIN or their vehicle (n=8). Log-rank statistics with Bonferroni’s correction test was used to compare statistical significances between treatment groups (p=1 for all comparisons).

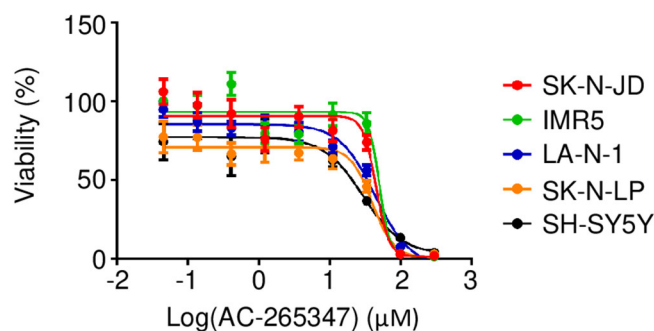

**Figure S2.** AC-265347 does not exert a cytotoxic effect on NB cell lines. Indicated neuroblastoma cell lines were treated with consecutive lower concentration of AC-265347 (starting at 200  $\mu$ M) to evaluate cytotoxic activity. Each point represents mean  $\pm$  SEM of six technical replicates and IC<sub>50</sub> was calculated using GraphPad.

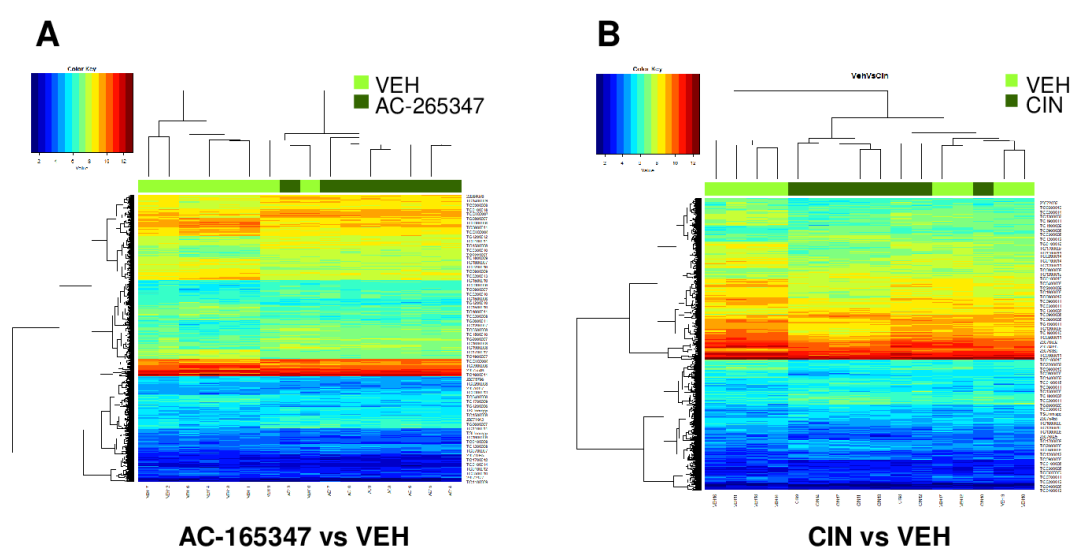

**Figure S3.** Genome-wide expression analyses of AC-265347, CIN and Vehicle treated neuroblastoma xenografts. Hierarchical clustering of gene expression pattern in LA-N-1 xenografts models exposed to **A**– AC-265347 and **B**– CIN compared to Vehicle treated mice. These were the eight tumors exposed for the longest time to the drugs.

**Table S1.** Primers and Taqman probes used for genes expression analysis.

| Gene           | Assays on Demand | Forward               | Reverse               |
|----------------|------------------|-----------------------|-----------------------|
| <i>BID</i>     | -                | CTTAGCCAGAAATGGGATG   | AGTCACAGCTATCTTCCAG   |
| <i>CASR</i>    | Hs01047795_m1    | -                     | -                     |
| <i>CD44</i>    | Hs01075861_m1    | -                     | -                     |
| <i>CDH5</i>    | -                | CCACAACGAGGGCATCATCA  | GAGGTCGATGGTGGGGTCTG  |
| <i>CHOP</i>    | Hs99999172_m1    | -                     | -                     |
| <i>CTCF</i>    | -                | GCACGGAAAAGCGACCTACG  | TGAGGGCATAGCGTTCATGG  |
| <i>GAGE-P1</i> | -                | GCAGCTGCTCAGGAGGGAGA  | TGTGGGTGACCCTGTTCTCTG |
| <i>GAGE-P2</i> | -                | GGCCGAAGCCTGAAGCTCAT  | ATTGCGGGTCCATCTCTCT   |
| <i>GAGE-P3</i> | -                | GAGGGAGCATCTGCAGGTCAA | CCTGCCCATCAGGACCATCT  |
| <i>HES1</i>    | -                | -                     | -                     |
| <i>MAGE-A2</i> | -                | AACCAGGCAGTGAGGCCTTG  | AGCCTGTCCCCCTCAGAACC  |

|                 |               |                              |                              |
|-----------------|---------------|------------------------------|------------------------------|
| <b>MAGE-A3</b>  | -             | AAGGTGGCCGAGTTGGTTCA         | ACTGCCAATTTCCGACGACA         |
| <b>MAGE-A6</b>  | -             | CGGGGATCCCAAGAAGCTG          | TTTCAATGAGGGGCCCTTGGA        |
| <b>MYCN</b>     | Hs00232074_m1 | -                            | -                            |
| <b>NANOG</b>    | -             |                              |                              |
| <b>NEFL</b>     | Hs00196245_m1 | -                            | -                            |
| <b>NTRK1</b>    | Hs01021011_m1 | GACGCTTCGTGTTTCAGCTCGCG      | CTCGGTTGAGCGTTCTTGC          |
| <b>NTRK3</b>    | Hs00176797_m1 |                              |                              |
| <b>NY-ESO-1</b> | -             | TGCTTGAGTTCTACCTCGCCAT       | GCTCCTGCGGGGCCAG             |
| <b>POU5F1</b>   | -             |                              |                              |
| <b>p75/NTR</b>  | Hs00609977_m1 | -                            |                              |
| <b>RYR</b>      | -             | GCTCAAGGTGGTGGTCATCG         | TTGAAGACCGGGAGGTGGAC         |
| <b>S100-B</b>   | Hs00902901_m1 | -                            |                              |
| <b>SOX2</b>     | -             |                              | -                            |
| <b>SSX4/4B</b>  | -             | CACCCTCCACCTTTTCATGC         | GGACGTTCAACCTGATTCTGT<br>G   |
| <b>TBP</b>      | -             | GAACATCATGGATCAGAACAAC<br>AG | ATTGGTGTCTCTGAATAGGCTGT<br>G |
| <b>TGFβ1</b>    | -             | CTGGAGAGGGCCCAGCATCT         | CGCACGCAGCAGTTCTTCTC         |
| <b>TUBB3</b>    | Hs00801390_m1 | -                            | -                            |
